# Supplementary material for: Changes in Glaucoma Medication during the Past Eight Years and Future Directions in Japan Based on an Insurance Medical Claim Database
Source: Hindawi journal article supplement (doi:10.1155/2017/7642049), 2017-01-01
Supplement: f1 [file 7642049.f1.pdf]

1 Supplemental Tables

2 Supplemental Table 1

3

| <b>Classification #</b> | <b>Definition</b>                                         |
|-------------------------|-----------------------------------------------------------|
| H40.0                   | Glaucoma suspect                                          |
| H40.1                   | Primary open-angle glaucoma                               |
| H40.3                   | Glaucoma secondary to eye trauma                          |
| H40.4                   | Glaucoma secondary to eye inflammation                    |
| H40.5                   | Glaucoma secondary to other eye disorders                 |
| H40.6                   | Glaucoma secondary to drugs                               |
| H40.8                   | Other glaucoma                                            |
| H40.9                   | Glaucoma, unspecified                                     |
| H42                     | Glaucoma in diseases classified elsewhere                 |
| H42.0                   | Glaucoma in endocrine, nutritional and metabolic diseases |
| H42.8                   | Glaucoma in other diseases classified elsewhere           |

4

5

1 Supplemental Table 2

2

| <b>Name of compound</b>                   | <b>Category</b> |
|-------------------------------------------|-----------------|
| Isopropyl unoprostoneone                  | PG              |
| Nipradilol                                | BB              |
| Brinzolamide                              | CAI             |
| Timolol maleate                           | BB              |
| Latanoprost                               | PG              |
| Apraclonidine hydrochloride               | others          |
| Carteolol hydrochloride                   | BB              |
| Dipivefrin Hydrochloride                  | others          |
| Dorzolamide hydrochloride                 | CAI             |
| Pilocarpine hydrochloride                 | others          |
| Bunazosin hydrochloride                   | BB              |
| Levobunolol hydrochloride                 | BB              |
| Distigmine bromide                        | Others          |
| Travoprost                                | PG              |
| Tafluprost                                | PG              |
| Bimatoprost                               | PG              |
| Timolol maleate/latanoprost               | PG + BB         |
| Timolol maleate/dorzolamide hydrochloride | BB + CAI        |
| Timolol maleate//travoprost               | PG + BB         |

3

4

5

6
